# Supplementary material for: Subjective experience of time in dementia with Lewy bodies during COVID-19 lockdown
Source: Research Square preprint supplement (doi:10.21203/rs.3.rs-107635/v1), 2020-11-13
Supplement: Supplementary file 1 [file 82f3551011ec21259e3a64ff.docx]

**Supplementary Material**

| **A** | DLB  (*Mdn*; *IQR*) | Caregivers  (*Mdn*; *IQR*) | Younger  (*Mdn*; *IQR*) | Older-PRE  (*Mdn*; *IQR*) | Younger-PRE  (*Mdn*; *IQR*) | DLB-POST  (*Mdn*; *IQR*) |
| --- | --- | --- | --- | --- | --- | --- |
| i1 | 0.00; 2.00 | 1.00; 1.00 | 1.00; 1.00 | 1.00; 0.50 | 1.00; 1.00 | 0.00; 2.00 |
| i2 | 0.00; 1.00 | 1.00; 0.00 | 1.00; 1.75 | 1.00; 1.00 | 1.00; 1.00 | 0.00; 2.00 |
| STQ-PRESENT | 0.00; 1.25 | 1.00; 0.50 | 0.75; 0.50 | 1.00; 0.75 | 1.00; 0.50 | 0.00; 1.25 |
| i3 | 0.00; 2.00 | 1.00; 1.00 | 1.00; 2.00 | 1.00; 2.00 | 1.00; 2.00 | 0.00; 2.00 |
| i4 | 0.00; 2.00 | 1.00; 1.00 | 1.00; 2.00 | 1.00; 2.00 | 1.00; 1.75 | -0.50; 1.75 |
| STQ-LOCKDOWN | 0.00; 1.25 | 1.00; 1.00 | 1.00; 1.50 | 1.00; 1.625 | 1.00; 1.00 | 0.00; 1.375 |
| i5 | 1.00; 1.00 | 1.00; 0.00 | 1.00; 1.00 | 1.00; 1.25 | 1.00; 1.75 | 0.00; 1.75 |
| i6 | 1.00; 2.00 | 1.00; 1.00 | 1.00; 2.00 | 1.00; 0.25 | 0.00; 1.00 | 1.00; 1.00 |
| STQ-PAST | 0.50; 1.25 | 1.00; 0.50 | 1.00; 1.00 | 1.00; 1.00 | 0.50; 1.00 | 0.25; 0.50 |
| ii1 | 2.00; 1.50 | 2.00; 2.00 | 3.50; 2.00 | 4.00; 2.00 | 3.00; 2.00 | 2.00; 0.00 |
| ii2 | 2.00; 2.00 | 2.00; 0.00 | 2.00; 2.75 | 2.00; 1.00 | 2.00; 2.00 | 3.00; 1.75 |
| ii3 | 2.00; 1.00 | 2.00; 1.00 | 2.00; 2.00 | 2.00; 0.00 | 2.00; 2.00 | 2.00; 1.00 |
| ii4 | 2.00; 3.00 | 2.00; 2.00 | 4.00; 0.00 | 4.00; 1.25 | 4.00; 1.00 | 2.00; 2.50 |
| ii5 | 2.00; 1.50 | 2.00; 2.00 | 3.50; 2.00 | 4.00; 2.00 | 4.00; 1.00 | 2.00; 0.00 |
| ii6 | 2.00; 3.00 | 2.00; 2.00 | 2.00; 1.00 | 2.00; 0.25 | 3.00; 2.00 | 3.50; 2.75 |
| ii7 | 4.00; 1.00 | 4.00; 2.00 | 4.00; 1.00 | 4.00; 0.25 | 4.00; 1.00 | 4.00; 1.75 |
| ii8 | 4.00; 2.00 | 3.00; 2.00 | 2.00; 1.50 | 2.00; 1.25 | 2.00; 1.50 | 4.00; 1.75 |
| ii9 | 4.00; 1.50 | 4.00; 0.00 | 4.00; 0.00 | 3.50; 2.00 | 4.00; 0.75 | 4.00; 2.00 |
| ii10 | 3.00; 2.00 | 4.00; 1.00 | 4.00; 1.00 | 4.00; 0.25 | 4.00; 1.00 | 2.50; 2.00 |
| Time Pressure | 2.80; 0.90 | 3.40; 0.80 | 3.80; 1.00 | 3.90; 1.00 | 3.90; 0.80 | 2.60; 0.95 |
| Time Expansion | 3.00; 1.00 | 2.60; 0.80 | 2.60; 0.95 | 2.40; 0.65 | 2.80; 0.75 | 2.80; 0.80 |

*Table A: Median (Mdn) and inter-quartile range (IQR) values on STQ items.*

| **B** | DLB  vs  Caregivers | DLB  vs  Younger | Caregivers  vs  Younger | Younger  vs  Younger-PRE | Caregivers  vs  Older-PRE | DLB  vs  DLB-POST |
| --- | --- | --- | --- | --- | --- | --- |
| i1 | 0.099* | **0.007***** | 0.667 | 0.323 | 0.109 | 0.946 |
| i2 | 0.064* | **0.048**** | 0.792 | 0.832 | 0.831 | 0.375 |
| STQ-PRESENT | **0.038**** | **0.005***** | 0.599 | 0.766 | 0.291 | 0.769 |
| i3 | **0.031**** | **0.006***** | 0.585 | 0.402 | 0.302 | 1.000 |
| i4 | 0.500 | 0.315 | 0.702 | 0.120 | 0.071* | 0.260 |
| STQ-LOCKDOWN | 0.081* | **0.023***** | 0.507 | 0.233 | 0.087* | 0.439 |
| i5 | 0.195 | **0.041**** | 0.553 | 0.531 | 0.528 | 0.058 |
| i6 | 0.117 | 0.623 | 0.111 | **0.007***** | **0.019***** | 0.605 |
| STQ-PAST | 0.062* | 0.121 | 0.498 | **0.020***** | 0.544 | 0.160 |
| ii1 | 0.141 | **0.005***** | 0.224 | 0.851 | 0.348 | 0.484 |
| ii2 | 0.496 | 0.730 | 0.638 | 0.641 | 0.534 | 0.763 |
| ii3 | 0.859 | 0.247 | 0.375 | 0.819 | 0.383 | 0.809 |
| ii4 | 0.817 | **0.000***** | **0.000***** | 0.535 | **0.004***** | 1.000 |
| ii5 | **0.042**** | **0.000***** | 0.147 | 0.066* | 0.066* | 0.598 |
| ii6 | 0.680 | 0.537 | 0.994 | **0.008***** | 0.720 | 0.774 |
| ii7 | 0.890 | 0.433 | 0.724 | 0.321 | 0.571 | 0.042 |
| ii8 | **0.017***** | **0.000***** | 0.335 | **0.008***** | 0.052* | 0.858 |
| ii9 | 0.459 | 0.322 | 0.949 | 0.969 | **0.03**** | 0.495 |
| ii10 | **0.001***** | **0.000***** | 0.665 | 0.688 | 0.255 | 0.956 |
| Time Pressure | **0.036**** | **0.000***** | **0.021***** | 0.280 | 0.101 | 0.278 |
| Time Expansion | 0.272 | 0.263 | 0.744 | 0.771 | 0.338 | 0.792 |

*Table B: item per item comparison with Mann-Whitney U test; * = p < 0.1; ** = p < 0.05; *** = p < 0.03.* *Bold values show significant results.*
